# Supplementary material for: Interfacial engineering enabling solution-processed Cu:NiOx/Sb2Se3/TiO2/Pt photocathodes for highly efficient photoelectrochemical water-splitting
Source: Royal Society of Chemistry journal article supplement (doi:10.1039/d4se00602j), 2024-01-01
Supplement: d4se00602j1.pdf [file d4se00602j1.pdf]

**Supporting Information**

**For**

**Interfacial Engineering Enabling Solution - Processed Cu: NiO<sub>x</sub>/Sb<sub>2</sub>Se<sub>3</sub>/TiO<sub>2</sub>/Pt Photocathode for  
Highly Efficient Photoelectrochemical Water – Splitting**

Yinbo Zhan, Ying-Chu Chen\*, and Xia Long\*

*China-UK Low Carbon College, Shanghai Jiao Tong University, Shanghai 201306, People's Republic  
of China*

\*Corresponding author. Phone: +021-8016-0859. E-mail address: ying-chu.chen@sjtu.edu.cn;

x.long@sjtu.edu.cn

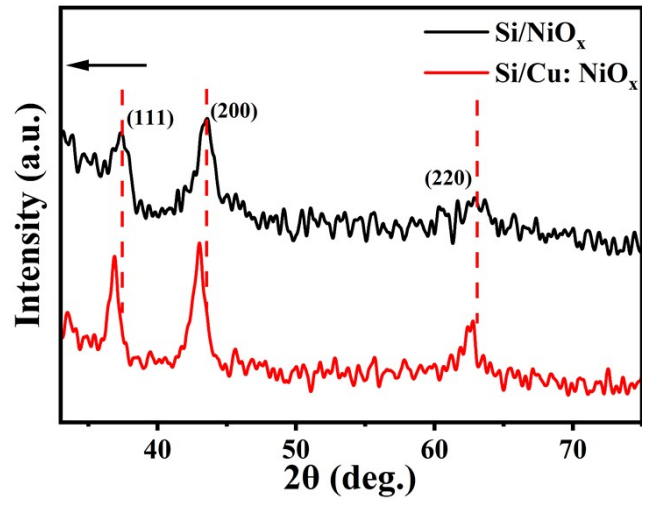

Fig. S1 XRD of Si/NiO<sub>x</sub> (black) and Si/Cu: NiO<sub>x</sub> (red).

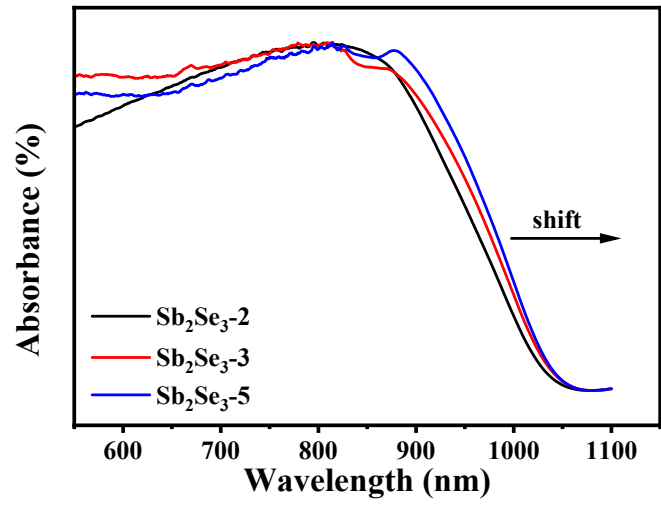

Fig. S2 UV-vis absorbance spectra for the three different spin coating times of Sb<sub>2</sub>Se<sub>3</sub>: Sb<sub>2</sub>Se<sub>3</sub>-2

(black), Sb<sub>2</sub>Se<sub>3</sub>-3 (red), and Sb<sub>2</sub>Se<sub>3</sub>-5 (blue).

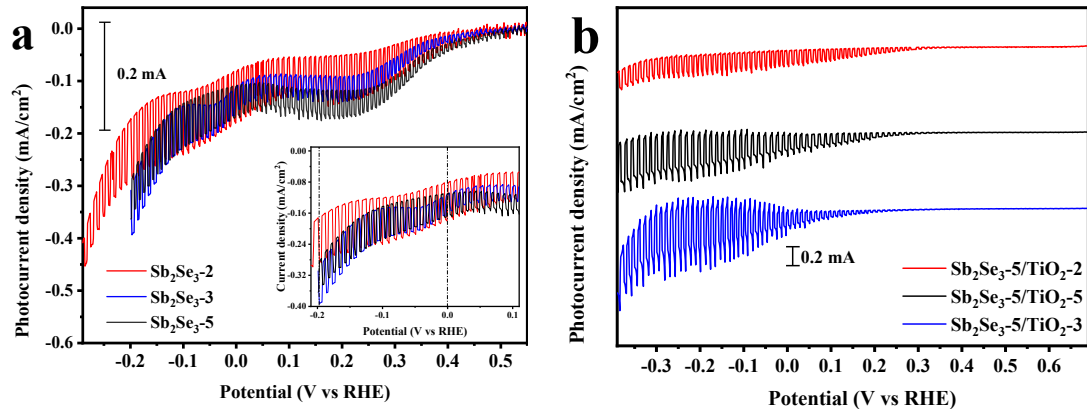

Fig. S3 LSV curves: (a) Spin-coating times of bare-Sb<sub>2</sub>Se<sub>3</sub> NPs (The insertion depicts an enlarged curve) and (b) different TiO<sub>2</sub> spin-coating times.

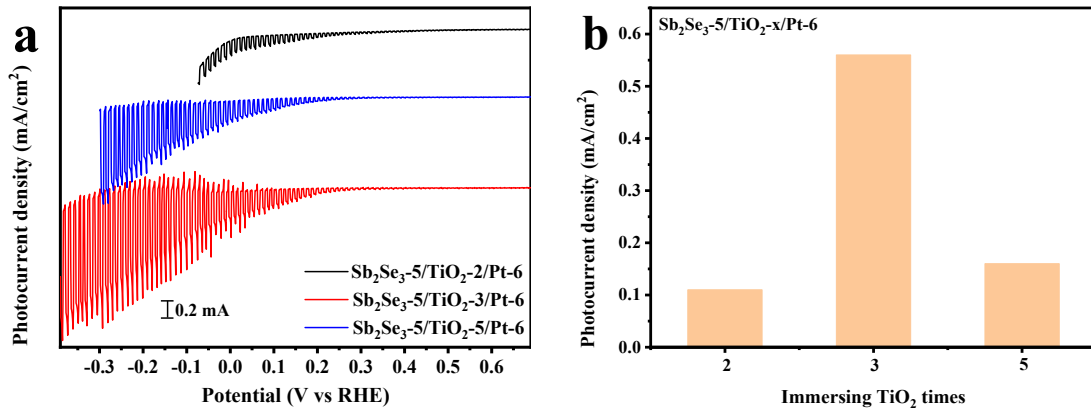

Fig. S4 (a) LSV curves and (b) the photocurrent under 0 V<sub>RHE</sub> of Sb<sub>2</sub>Se<sub>3</sub>-5/TiO<sub>2</sub>-x/Pt-6.

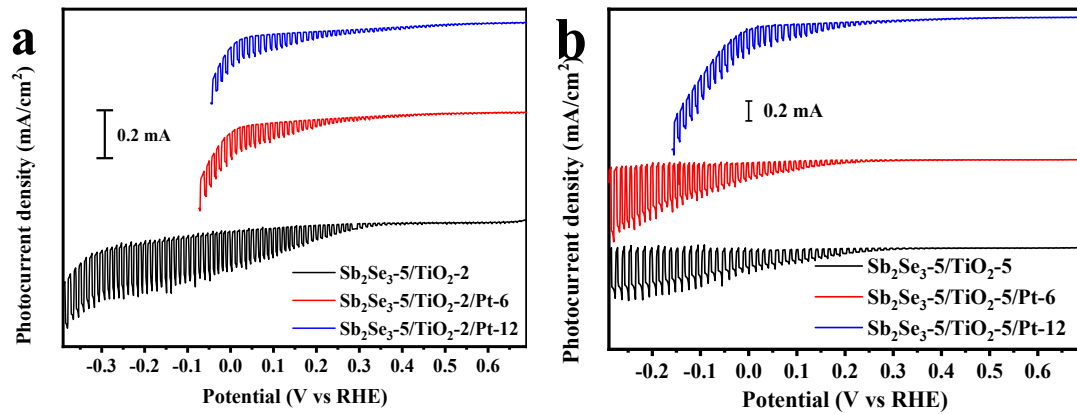

Fig. S5 LSV curves of Sb<sub>2</sub>Se<sub>3</sub>-based photocathodes with different TiO<sub>2</sub> NPs impregnation times: (a) 2 times and (b) 5 times.

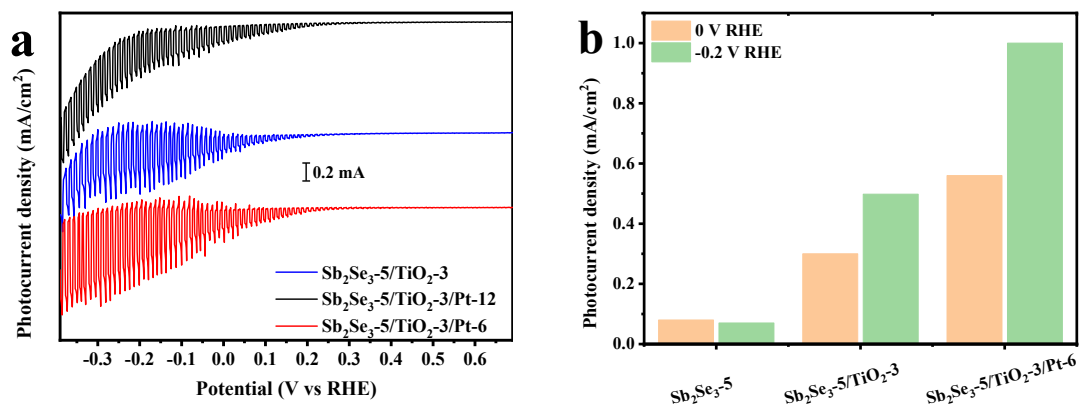

**Fig. S6** (a) Different Pt impregnation times and (b) the comparison of photocurrent for Sb<sub>2</sub>Se<sub>3</sub>-5, Sb<sub>2</sub>Se<sub>3</sub>-5/TiO<sub>2</sub>-3 and Sb<sub>2</sub>Se<sub>3</sub>-5/TiO<sub>2</sub>-3/Pt-6.

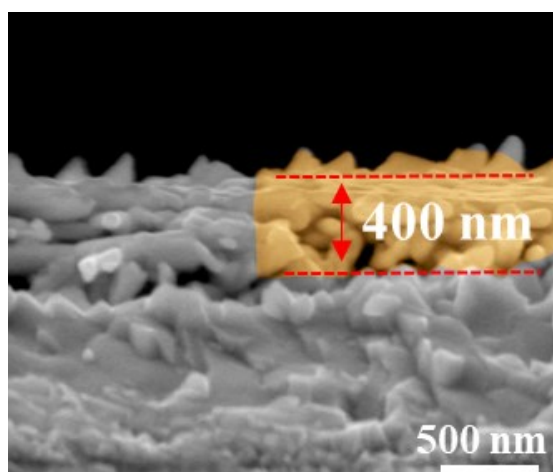

**Fig. S7** The Cross-view SEM image of Sb<sub>2</sub>Se<sub>3</sub>-5/TiO<sub>2</sub>-3/Pt-6.

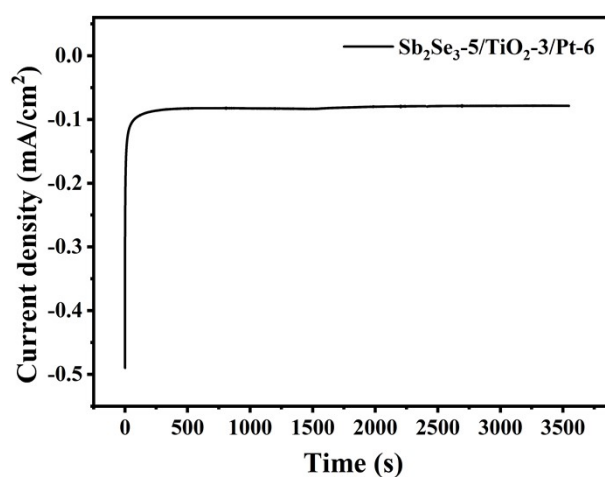

**Fig. S8** Chronoamperometry stability measurement on the Sb<sub>2</sub>Se<sub>3</sub>-5/TiO<sub>2</sub>-3/Pt-6 with a 0 V<sub>RHE</sub> in an electrolyte with a pH 1 under AM 1.5G simulated sunlight.

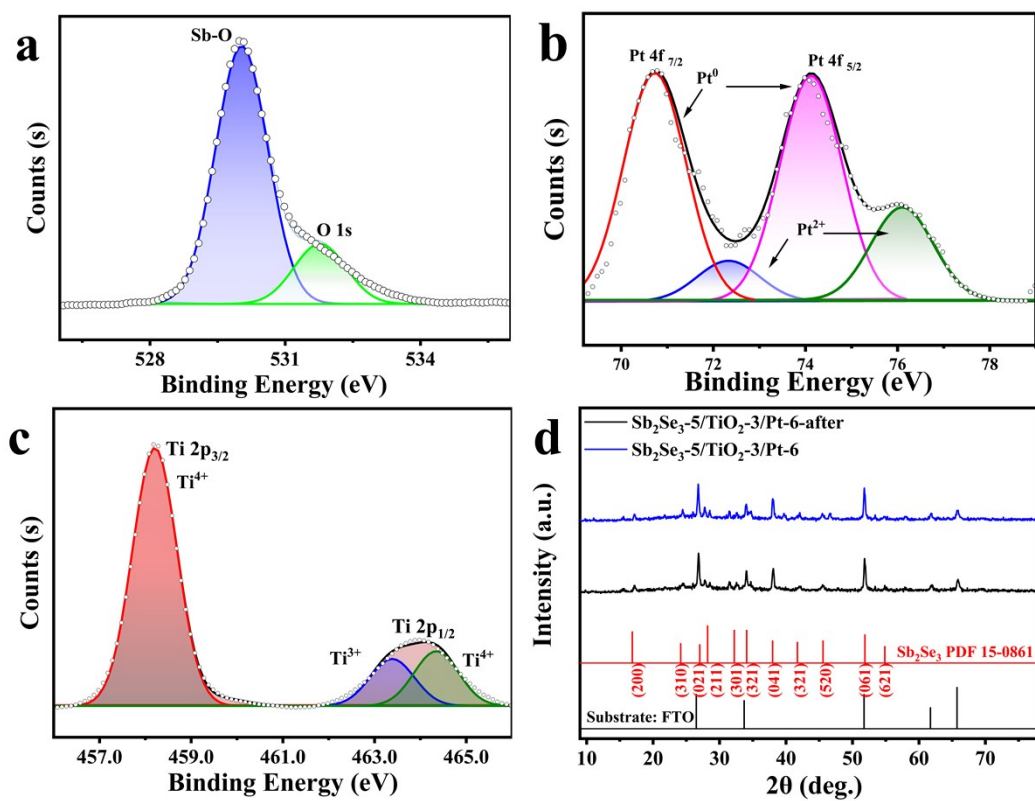

**Fig. S9** XPS spectra of (a) Sb 3d, (b) Pt 4f, and (c) Ti 2p, and (d) XRD patterns of Sb<sub>2</sub>Se<sub>3</sub>-5/TiO<sub>2</sub>-3/Pt-6 after chronoamperometry stability test.

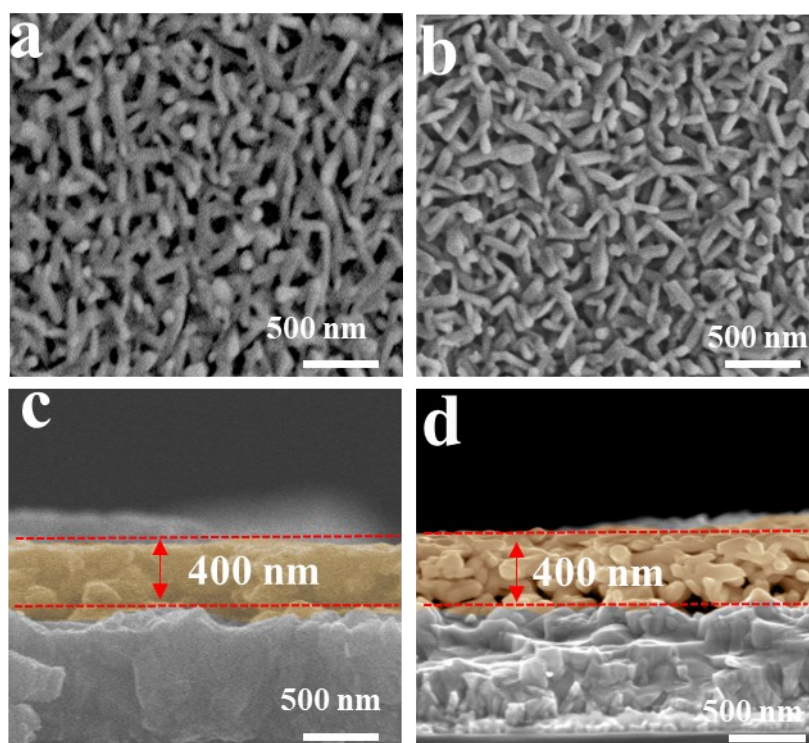

**Fig. S10** (a-b) Top-view SEM image and (c-d) cross-view SEM images of Sb<sub>2</sub>Se<sub>3</sub>-5/TiO<sub>2</sub>-3/Pt-6 before

(first row) and after (second row) chronoamperometry stability measurement.

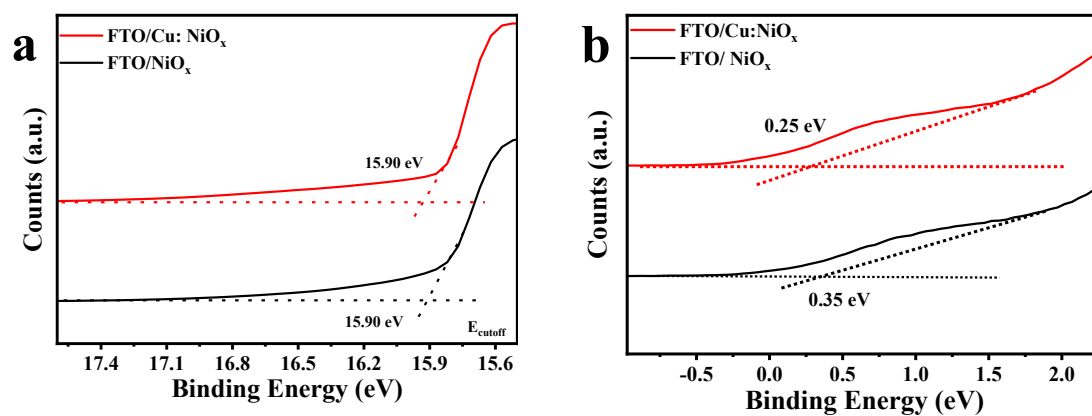

**Fig. S11** The UPS spectra for FTO/ NiO<sub>x</sub> and FTO/Cu: NiO<sub>x</sub>, obtained using He I radiation at 21.21 eV

for determination: (a)  $E_{\text{cutoff}}$  and (b)  $E_{\text{edge}}$ .
